# Supplementary material for: The Role of Galanin during Bacterial Infection in Larval Zebrafish
Source: MDPI journal article supplement (doi:10.3390/cells10082011), 2021-08-06
Supplement: s1 [file s1]

**Galanin receptor expression in *gal*<sup>+/+</sup> after *M. marinum* infection**

| Ensembl gene ID    | Abbreviated gene name | Fold change  | P-value  |
|--------------------|-----------------------|--------------|----------|
| ENSDARG00000005522 | galr1a                | -1.075620697 | 0.829210 |
| ENSDARG00000079165 | galr1b                | -1.047225932 | 0.825372 |
| ENSDARG00000020853 | galr2a                | 1.053631371  | 0.908397 |
| ENSDARG00000105113 | galr2b                | 1.086749172  | 0.276419 |

**Galanin receptor expression in *gal*<sup>-/-</sup> after *M. marinum* infection**

| Ensembl gene ID    | Abbreviated gene name | Fold change  | P-value |
|--------------------|-----------------------|--------------|---------|
| ENSDARG00000005522 | galr1a                | 1.134369372  | 0.68301 |
| ENSDARG00000079165 | galr1b                | -1.038377255 | 0.88766 |
| ENSDARG00000020853 | galr2a                | 1.78971366   | 0.13027 |
| ENSDARG00000105113 | galr2b                | 1.034847303  | 0.64456 |

**Galanin receptor expression in *gal*<sup>-/-</sup>**

| Ensembl gene ID    | Abbreviated gene name | Fold change  | P-value |
|--------------------|-----------------------|--------------|---------|
| ENSDARG00000005522 | galr1a                | -1.029615704 | 0.93750 |
| ENSDARG00000079165 | galr1b                | 1.331773648  | 0.17923 |
| ENSDARG00000020853 | galr2a                | 2.012035741  | 0.07667 |
| ENSDARG00000105113 | galr2b                | 1.049433167  | 0.64678 |

**Table S2.** Expression of galanin receptors in *gal*<sup>+/+</sup> and *gal*<sup>-/-</sup> after *M. marinum* infection and *gal*<sup>-/-</sup> without infection.
