# Supplementary material for: The Role of Galanin during Bacterial Infection in Larval Zebrafish
Source: MDPI journal article supplement (doi:10.3390/cells10082011), 2021-08-06
Supplement: s1 [file s1]

| GENE          | Forward 5'-3'            | Reverse 5'-3'          | Accession    |
|---------------|--------------------------|------------------------|--------------|
| <i>irg1l</i>  | GGTTAGAAGCAAGTCCTC       | TGTGTTTCATCCTCCTCAG    | NM_001077607 |
| <i>il1b</i>   | GAACAGAATGAAGCACATCAAACC | ACGGCACTGAATCCACCAC    | NM_212844    |
| <i>tnfa</i>   | AGACCTTAGACTGGAGAGATGAC  | CAAAGACACCTGGCTGTAGAC  | NM_212829    |
| <i>cxcl8a</i> | TGTGTAATTGTTTTCTGGCATTTC | GCGACAGCGTGGATCTACAG   | XM_001342570 |
| <i>ppial</i>  | AACTGAAACACGGAGGCAAAG    | CATCCACAACCTTCCCGAACAC | AY391451     |

**Table S1.** Primer sequences and Genbank accessions for genes analyzed in this study.
