# Supplementary material for: The Role of Galanin during Bacterial Infection in Larval Zebrafish
Source: MDPI journal article supplement (doi:10.3390/cells10082011), 2021-08-06
Supplement: s1 [file s1]

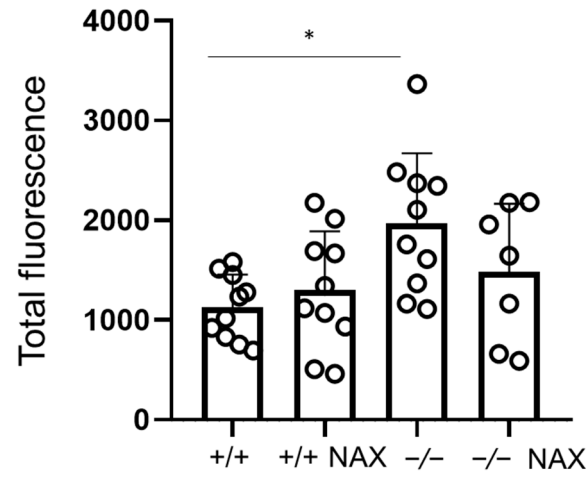

**Figure S2.** Quantification of macrophages in the *gal*<sup>+/+</sup> Tg(*mpeg1*:EGFP) (+/+) and *gal*<sup>-/-</sup> Tg(*mpeg1*:EGFP) zebrafish larvae. Total fluorescence of *gal*<sup>+/+</sup> Tg(*mpeg1*:EGFP) (+/+) and *gal*<sup>-/-</sup> Tg(*mpeg1*:EGFP) (-/-) without or with (+/+ NAX; -/- NAX) NAX 5055 treatment. Data is combined from three biological replicates (n=10 larvae/group). \*P<0.05
