# Supplementary material for: The Role of Galanin during Bacterial Infection in Larval Zebrafish
Source: MDPI journal article supplement (doi:10.3390/cells10082011), 2021-08-06
Supplement: s1 [file s1]

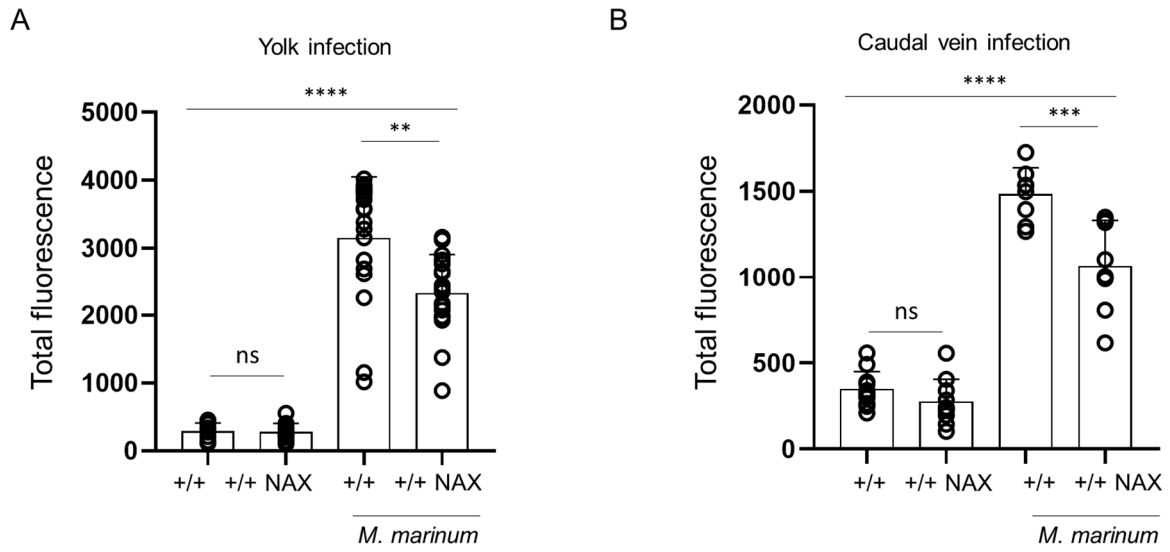

**Figure S1. (A)(B)** Bacterial burden in non-infected wild-type larvae, infected wild-type larvae and, infected and non-infected, wild-type larvae treated with NAX 5055 after (A) *M. marinum* yolk or (B) caudal vein infection. Data is combined from three biological replicates. \*\* $P < 0.01$ ; \*\*\* $P < 0.001$ ; \*\*\*\* $P < 0.0001$ ; ns, non-significant.
